# Supplementary material for: Smartphone Photogrammetric Assessment for Head Measurements
Source: MDPI journal article supplement (doi:10.3390/s23219008), 2023-11-06
Supplement: s1 [file s1]

## Supplementary Materials

**Accuracy Assessment Smartphone Galaxy S22.** The degree repeatability of the distances obtained for the 12 PhotoMeDAS models obtained with the Galaxy S22 smartphone for: **Processing I** , **Processing II** and **Processing III**, can be analysed first by observing the differences in Tables S1.1, S1.2 and S1.3.

**Table S1.1.** Results Processing I with Samsung Galaxy S22.

| Model          | Dist.<br>Preauricular<br>(mm) | Dist.<br>Lateral<br>(mm) | Dist.<br>Max right<br>(mm) | Dist.<br>Max left<br>(mm) | Variation<br>Preauricular<br>(mm) | Variation<br>Lateral<br>(mm) | Variation<br>Max right<br>(mm) | Variation<br>Max left<br>(mm) |
|----------------|-------------------------------|--------------------------|----------------------------|---------------------------|-----------------------------------|------------------------------|--------------------------------|-------------------------------|
| 1              | 128.8                         | 141.0                    | 171.9                      | 170.5                     | -1.6                              | -0.8                         | -1.1                           | -1.0                          |
| 2              | 128.1                         | 140.9                    | 172.1                      | 170.8                     | -1.0                              | -0.7                         | -1.3                           | -1.3                          |
| 3              | 128.0                         | 141.1                    | 172.4                      | 171.1                     | -0.8                              | -1.0                         | -1.6                           | -1.7                          |
| 4              | 129.0                         | 141.8                    | 172.6                      | 171.4                     | -1.8                              | -1.6                         | -1.8                           | -1.9                          |
| 5              | 127.6                         | 140.3                    | 172.1                      | 170.7                     | -0.4                              | -0.1                         | -1.3                           | -1.1                          |
| 6              | 129.4                         | 141.6                    | 172.4                      | 171.1                     | -2.1                              | -1.4                         | -1.6                           | -1.7                          |
| 7              | 128.1                         | 141.3                    | 172.3                      | 171.0                     | -1.0                              | -1.1                         | -1.5                           | -1.5                          |
| 8              | 127.4                         | 141.1                    | 172.4                      | 171.1                     | -0.1                              | -0.9                         | -1.6                           | -1.6                          |
| 9              | 127.8                         | 140.4                    | 172.0                      | 170.8                     | -0.6                              | -0.1                         | -1.1                           | -1.3                          |
| 10             | 127.7                         | 140.8                    | 171.7                      | 170.3                     | -0.5                              | -0.6                         | -0.9                           | -0.8                          |
| 11             | 128.3                         | 140.8                    | 171.7                      | 170.3                     | -1.1                              | -0.6                         | -0.9                           | -0.8                          |
| 12             | 128.1                         | 141.9                    | 173.3                      | 171.8                     | -1.0                              | -1.7                         | -2.5                           | -2.3                          |
| Minimum        | 127.4                         | 140.3                    | 171.7                      | 170.3                     | -2.1                              | -1.7                         | -2.5                           | -2.3                          |
| Maximum        | 129.4                         | 141.9                    | 173.3                      | 171.8                     | -0.1                              | -0.1                         | -0.9                           | -0.8                          |
| Range          | 2.0                           | 1.6                      | 1.6                        | 1.5                       | 2.0                               | 1.6                          | 1.6                            | 1.5                           |
| Average        | 128.2                         | 141.1                    | 172.2                      | 170.9                     | -1.0                              | -0.9                         | -1.4                           | -1.4                          |
| Std. deviation | 0.6                           | 0.5                      | 0.4                        | 0.4                       | 0.6                               | 0.5                          | 0.4                            | 0.4                           |

**Table S1.2.** Results Processing II with Samsung Galaxy S22.

| Model          | Dist.<br>Preauricular<br>(mm) | Dist.<br>Lateral<br>(mm) | Dist.<br>Max right<br>(mm) | Dist.<br>Max left<br>(mm) | Variation<br>Preauricular<br>(mm) | Variation<br>Lateral<br>(mm) | Variation<br>Max right<br>(mm) | Variation<br>Max left<br>(mm) |
|----------------|-------------------------------|--------------------------|----------------------------|---------------------------|-----------------------------------|------------------------------|--------------------------------|-------------------------------|
| 1              | 128.3                         | 141.3                    | 171.7                      | 170.3                     | -1.1                              | -0.8                         | -1.1                           | -0.9                          |
| 2              | 127.6                         | 141.1                    | 172.0                      | 170.6                     | -0.4                              | -1.1                         | -0.9                           | -1.2                          |
| 3              | 128.1                         | 141.6                    | 172.4                      | 171.1                     | -1.0                              | -1.7                         | -1.4                           | -1.6                          |
| 4              | 128.9                         | 142.1                    | 172.4                      | 171.1                     | -1.7                              | -1.6                         | -1.9                           | -1.6                          |
| 5              | 127.4                         | 140.7                    | 172.1                      | 170.4                     | -0.2                              | -0.9                         | -0.5                           | -1.3                          |
| 6              | 129.1                         | 141.9                    | 172.1                      | 170.9                     | -2.0                              | -1.4                         | -1.7                           | -1.3                          |
| 7              | 127.7                         | 141.3                    | 171.7                      | 170.5                     | -0.5                              | -1.0                         | -1.1                           | -0.9                          |
| 8              | 127.1                         | 141.1                    | 172.1                      | 170.9                     | 0.1                               | -1.4                         | -1.0                           | -1.4                          |
| 9              | 128.0                         | 141.4                    | 171.1                      | 170.1                     | -0.8                              | -0.6                         | -1.2                           | -0.4                          |
| 10             | 127.9                         | 141.1                    | 171.5                      | 170.1                     | -0.7                              | -0.6                         | -1.0                           | -0.7                          |
| 11             | 128.3                         | 141.1                    | 171.6                      | 170.1                     | -1.1                              | -0.7                         | -1.0                           | -0.8                          |
| 12             | 128.5                         | 142.1                    | 173.1                      | 171.8                     | -1.3                              | -2.3                         | -2.0                           | -2.4                          |
| Minimum        | 127.1                         | 140.7                    | 171.1                      | 170.1                     | -2.0                              | -2.3                         | -2.0                           | -2.4                          |
| Maximum        | 129.1                         | 142.1                    | 173.1                      | 171.8                     | 0.1                               | -0.6                         | -0.5                           | -0.4                          |
| Range          | 2.0                           | 1.4                      | 2.0                        | 1.7                       | 2.1                               | 1.7                          | 1.5                            | 2.0                           |
| Average        | 128.1                         | 141.4                    | 172.0                      | 170.7                     | -0.9                              | -1.2                         | -1.2                           | -1.2                          |
| Std. deviation | 0.6                           | 0.4                      | 0.5                        | 0.5                       | 0.6                               | 0.5                          | 0.4                            | 0.5                           |

Table S1.3. Results Processing III with Samsung Galaxy S22.

| Model          | Dist.<br>Preauricular<br>(mm) | Dist.<br>Lateral<br>(mm) | Dist.<br>Max right<br>(mm) | Dist.<br>Max left<br>(mm) | Variation<br>Preauricular<br>(mm) | Variation<br>Lateral<br>(mm) | Variation<br>Max right<br>(mm) | Variation<br>Max left<br>(mm) |
|----------------|-------------------------------|--------------------------|----------------------------|---------------------------|-----------------------------------|------------------------------|--------------------------------|-------------------------------|
| 1              | 127.8                         | 141.1                    | 171.6                      | 170.3                     | -0.6                              | -0.9                         | -0.8                           | -0.8                          |
| 2              | 127.7                         | 141.1                    | 171.6                      | 170.1                     | -0.5                              | -0.9                         | -0.8                           | -0.6                          |
| 3              | 128.1                         | 141.5                    | 172.5                      | 171.1                     | -0.9                              | -1.3                         | -1.7                           | -1.7                          |
| 4              | 128.1                         | 141.8                    | 173.0                      | 171.6                     | -1.0                              | -1.6                         | -2.2                           | -2.1                          |
| 5              | 127.7                         | 140.7                    | 172.1                      | 170.7                     | -0.5                              | -0.5                         | -1.4                           | -1.2                          |
| 6              | 128.5                         | 141.7                    | 172.4                      | 171.1                     | -1.3                              | -1.5                         | -1.6                           | -1.6                          |
| 7              | 128.0                         | 141.4                    | 172.0                      | 171.0                     | -0.8                              | -1.2                         | -1.2                           | -1.5                          |
| 8              | 127.1                         | 141.1                    | 171.9                      | 170.6                     | 0.0                               | -1.0                         | -1.1                           | -1.1                          |
| 9              | 127.5                         | 141.0                    | 171.3                      | 170.1                     | -0.3                              | -0.8                         | -0.5                           | -0.6                          |
| 10             | 126.9                         | 140.6                    | 171.4                      | 170.1                     | 0.3                               | -0.4                         | -0.6                           | -0.6                          |
| 11             | 128.1                         | 141.0                    | 171.6                      | 170.4                     | -0.9                              | -0.8                         | -0.8                           | -0.9                          |
| 12             | 128.9                         | 142.4                    | 173.1                      | 171.8                     | -1.7                              | -2.2                         | -2.3                           | -2.3                          |
| Minimum        | 126.9                         | 140.6                    | 171.3                      | 170.1                     | -1.7                              | -2.2                         | -2.3                           | -2.3                          |
| Maximum        | 128.9                         | 142.4                    | 173.1                      | 171.8                     | 0.3                               | -0.4                         | -0.5                           | -0.6                          |
| Range          | 2.0                           | 1.8                      | 1.8                        | 1.7                       | 2.0                               | 1.8                          | 1.8                            | 1.7                           |
| Average        | 127.9                         | 141.3                    | 172.0                      | 170.7                     | -0.7                              | -1.1                         | -1.2                           | -1.3                          |
| Std. deviation | 0.6                           | 0.5                      | 0.6                        | 0.6                       | 0.5                               | 0.5                          | 0.6                            | 0.6                           |

**Accuracy Assessment Smartphone Galaxy S22+.** The degree of repeatability of the distances obtained for the 12 PhotoMeDAS models obtained with the Galaxy S22+ smartphone for: **Processing I**, **Processing II** and **Processing III**, can be analysed first by observing the differences in Tables S2.1, S2.2 and S2.3.

Table S2.1. Results Processing I with Samsung Galaxy S22+.

| Model          | Dist.<br>Preauricular<br>(mm) | Dist.<br>Lateral<br>(mm) | Dist.<br>Max right<br>(mm) | Dist.<br>Max left<br>(mm) | Variation<br>Preauricular<br>(mm) | Variation<br>Lateral<br>(mm) | Variation<br>Max right<br>(mm) | Variation<br>Max left<br>(mm) |
|----------------|-------------------------------|--------------------------|----------------------------|---------------------------|-----------------------------------|------------------------------|--------------------------------|-------------------------------|
| 13             | 126.7                         | 139.4                    | 169.0                      | 168.2                     | 0.5                               | 0.8                          | 1.8                            | 1.3                           |
| 14             | 126.8                         | 139.3                    | 169.2                      | 168.2                     | 0.4                               | 0.9                          | 1.6                            | 1.3                           |
| 15             | 126.8                         | 139.3                    | 169.6                      | 169.0                     | 0.4                               | 0.9                          | 1.2                            | 0.5                           |
| 16             | 126.9                         | 139.2                    | 169.5                      | 168.8                     | 0.3                               | 1.0                          | 1.3                            | 0.7                           |
| 17             | 127.4                         | 140.0                    | 169.4                      | 168.5                     | -0.2                              | 0.2                          | 1.4                            | 1.0                           |
| 18             | 125.9                         | 139.0                    | 168.8                      | 168.0                     | 1.3                               | 1.2                          | 2.0                            | 1.5                           |
| 19             | 127.2                         | 139.3                    | 169.2                      | 168.5                     | 0.0                               | 0.9                          | 1.6                            | 1.0                           |
| 20             | 127.1                         | 139.6                    | 169.8                      | 168.9                     | 0.1                               | 0.6                          | 1.0                            | 0.6                           |
| 21             | 127.1                         | 139.6                    | 169.6                      | 168.9                     | 0.1                               | 0.6                          | 1.2                            | 0.6                           |
| 22             | 126.3                         | 139.3                    | 169.0                      | 168.3                     | 0.9                               | 0.9                          | 1.8                            | 1.2                           |
| 23             | 126.8                         | 139.2                    | 169.7                      | 168.4                     | 0.4                               | 1.0                          | 1.1                            | 1.1                           |
| 24             | 126.1                         | 138.6                    | 168.4                      | 167.7                     | 1.1                               | 1.6                          | 2.4                            | 1.8                           |
| Minimum        | 125.9                         | 138.6                    | 168.4                      | 167.7                     | -0.2                              | 0.2                          | 1.0                            | 0.5                           |
| Maximum        | 127.4                         | 140.0                    | 169.8                      | 169.0                     | 1.3                               | 1.6                          | 2.4                            | 1.8                           |
| Range          | 1.5                           | 1.4                      | 1.4                        | 1.3                       | 1.5                               | 1.4                          | 1.4                            | 1.3                           |
| Average        | 126.8                         | 139.3                    | 169.3                      | 168.5                     | 0.4                               | 0.9                          | 1.6                            | 1.0                           |
| Std. deviation | 0.5                           | 0.3                      | 0.4                        | 0.4                       | 0.5                               | 0.3                          | 0.4                            | 0.4                           |

Table S2.2. Results Processing II with Samsung Galaxy S22+.

16

| Model          | Dist.<br>Preauricular<br>(mm) | Dist.<br>Lateral<br>(mm) | Dist.<br>Max right<br>(mm) | Dist.<br>Max left<br>(mm) | Variation<br>Preauricular<br>(mm) | Variation<br>Lateral<br>(mm) | Variation<br>Max right<br>(mm) | Variation<br>Max left<br>(mm) |
|----------------|-------------------------------|--------------------------|----------------------------|---------------------------|-----------------------------------|------------------------------|--------------------------------|-------------------------------|
| 13             | 126.9                         | 139.7                    | 169.2                      | 168.4                     | 0.3                               | 0.5                          | 1.6                            | 1.1                           |
| 14             | 127.1                         | 139.8                    | 169.1                      | 168.3                     | 0.1                               | 0.4                          | 1.7                            | 1.2                           |
| 15             | 126.6                         | 139.5                    | 169.4                      | 168.7                     | 0.6                               | 0.7                          | 1.4                            | 0.8                           |
| 16             | 127.5                         | 139.9                    | 169.5                      | 168.7                     | -0.3                              | 0.3                          | 1.3                            | 0.8                           |
| 17             | 127.4                         | 140.0                    | 169.5                      | 168.6                     | -0.2                              | 0.2                          | 1.3                            | 0.9                           |
| 18             | 126.8                         | 139.6                    | 168.7                      | 167.9                     | 0.4                               | 0.6                          | 2.1                            | 1.6                           |
| 19             | 127.3                         | 139.5                    | 168.9                      | 168.3                     | -0.1                              | 0.7                          | 1.9                            | 1.2                           |
| 20             | 127.2                         | 139.8                    | 169.7                      | 169.0                     | 0.0                               | 0.4                          | 1.1                            | 0.5                           |
| 21             | 127.2                         | 139.9                    | 169.5                      | 168.8                     | 0.0                               | 0.3                          | 1.3                            | 0.7                           |
| 22             | 126.8                         | 139.9                    | 169.2                      | 168.4                     | 0.4                               | 0.3                          | 1.6                            | 1.1                           |
| 23             | 127.2                         | 139.9                    | 169.2                      | 168.1                     | 0.0                               | 0.3                          | 1.6                            | 1.4                           |
| 24             | 126.5                         | 139.3                    | 168.5                      | 167.7                     | 0.7                               | 0.9                          | 2.3                            | 1.8                           |
| Minimum        | 126.5                         | 139.3                    | 168.5                      | 167.7                     | -0.3                              | 0.2                          | 1.1                            | 0.5                           |
| Maximum        | 127.5                         | 140.0                    | 169.7                      | 169.0                     | 0.7                               | 0.9                          | 2.3                            | 1.8                           |
| Range          | 1.0                           | 0.7                      | 1.2                        | 1.3                       | 1.0                               | 0.7                          | 1.2                            | 1.3                           |
| Average        | 127.0                         | 139.7                    | 169.2                      | 168.4                     | 0.1                               | 0.5                          | 1.6                            | 1.1                           |
| Std. deviation | 0.3                           | 0.2                      | 0.4                        | 0.4                       | 0.3                               | 0.2                          | 0.4                            | 0.4                           |

Table S2.3. Results Processing III with Samsung Galaxy S22+.

17

| Model          | Dist.<br>Preauricular<br>(mm) | Dist.<br>Lateral<br>(mm) | Dist.<br>Max right<br>(mm) | Dist.<br>Max left<br>(mm) | Variation<br>Preauricular<br>(mm) | Variation<br>Lateral<br>(mm) | Variation<br>Max right<br>(mm) | Variation<br>Max left<br>(mm) |
|----------------|-------------------------------|--------------------------|----------------------------|---------------------------|-----------------------------------|------------------------------|--------------------------------|-------------------------------|
| 13             | 126.7                         | 139.7                    | 168.6                      | 167.9                     | 0.5                               | 0.5                          | 2.2                            | 1.6                           |
| 14             | 126.5                         | 139.7                    | 169.0                      | 168.1                     | 0.7                               | 0.5                          | 1.8                            | 1.4                           |
| 15             | 126.7                         | 139.9                    | 169.4                      | 168.6                     | 0.5                               | 0.3                          | 1.4                            | 0.9                           |
| 16             | 126.1                         | 139.7                    | 169.0                      | 168.2                     | 1.1                               | 0.5                          | 1.8                            | 1.3                           |
| 17             | 126.8                         | 139.8                    | 169.4                      | 168.7                     | 0.4                               | 0.4                          | 1.4                            | 0.8                           |
| 18             | 126.2                         | 139.3                    | 168.4                      | 167.7                     | 1.0                               | 0.9                          | 2.4                            | 1.8                           |
| 19             | 126.4                         | 139.2                    | 168.7                      | 168.2                     | 0.8                               | 1.0                          | 2.1                            | 1.3                           |
| 20             | 127.4                         | 140.4                    | 169.2                      | 168.7                     | -0.2                              | -0.2                         | 1.6                            | 0.8                           |
| 21             | 126.7                         | 139.7                    | 169.3                      | 168.7                     | 0.5                               | 0.5                          | 1.5                            | 0.8                           |
| 22             | 125.5                         | 139.3                    | 168.7                      | 168.1                     | 1.7                               | 0.9                          | 2.1                            | 1.4                           |
| 23             | 127.0                         | 139.8                    | 169.2                      | 167.9                     | 0.2                               | 0.4                          | 1.6                            | 1.6                           |
| 24             | 126.5                         | 139.3                    | 168.5                      | 167.7                     | 0.7                               | 0.9                          | 2.3                            | 1.8                           |
| Minimum        | 125.5                         | 139.2                    | 168.4                      | 167.7                     | -0.2                              | -0.2                         | 1.4                            | 0.8                           |
| Maximum        | 127.4                         | 140.4                    | 169.4                      | 168.7                     | 1.7                               | 1.0                          | 2.4                            | 1.8                           |
| Range          | 1.9                           | 1.2                      | 1.0                        | 1.0                       | 1.9                               | 1.2                          | 1.0                            | 1.0                           |
| Average        | 126.5                         | 139.7                    | 169.0                      | 168.2                     | 0.6                               | 0.5                          | 1.9                            | 1.3                           |
| Std. deviation | 0.5                           | 0.3                      | 0.4                        | 0.4                       | 0.5                               | 0.3                          | 0.4                            | 0.4                           |

18

19

20

21

**Accuracy Assessment Smartphone Galaxy S22 Ultra.** The degree of repeatability of the distances obtained for the 12 PhotoMeDAS models obtained with the Galaxy S22 Ultra smartphone for: **Processing I**, **Processing II** and **Processing III**, can be analysed first by observing the differences in Tables S3.1, S3.2 and S3.3.

**Table S3.1** Results Processing I with Samsung Galaxy S22 Ultra.

| Model          | Dist.<br>Preauricular<br>(mm) | Dist.<br>Lateral<br>(mm) | Dist.<br>Max right<br>(mm) | Dist.<br>Max left<br>(mm) | Variation<br>Preauricular<br>(mm) | Variation<br>Lateral<br>(mm) | Variation<br>Max right<br>(mm) | Variation<br>Max left<br>(mm) |
|----------------|-------------------------------|--------------------------|----------------------------|---------------------------|-----------------------------------|------------------------------|--------------------------------|-------------------------------|
| 25             | 128.8                         | 141.8                    | 172.5                      | 171.3                     | -1.6                              | -1.6                         | -1.7                           | -1.8                          |
| 26             | 128.8                         | 142.3                    | 172.7                      | 171.6                     | -1.6                              | -2.1                         | -1.9                           | -2.1                          |
| 27             | 129.3                         | 142.1                    | 172.3                      | 171.4                     | -2.1                              | -2.0                         | -1.5                           | -1.9                          |
| 28             | 129.7                         | 142.1                    | 172.4                      | 171.4                     | -2.5                              | -2.0                         | -1.6                           | -1.9                          |
| 29             | 128.8                         | 141.8                    | 172.5                      | 171.6                     | -1.6                              | -1.6                         | -1.7                           | -2.1                          |
| 30             | 129.7                         | 142.5                    | 172.7                      | 171.8                     | -2.5                              | -2.3                         | -1.9                           | -2.3                          |
| 31             | 128.9                         | 141.8                    | 172.6                      | 171.5                     | -1.7                              | -1.6                         | -1.8                           | -2.0                          |
| 32             | 129.1                         | 142.0                    | 172.6                      | 171.5                     | -1.9                              | -1.8                         | -1.8                           | -2.0                          |
| 33             | 128.9                         | 141.9                    | 172.9                      | 171.8                     | -1.7                              | -1.7                         | -2.1                           | -2.3                          |
| 34             | 128.7                         | 141.7                    | 172.7                      | 171.7                     | -1.5                              | -1.5                         | -1.9                           | -2.1                          |
| 35             | 129.6                         | 142.0                    | 172.1                      | 171.0                     | -2.4                              | -1.8                         | -1.4                           | -1.5                          |
| 36             | 129.4                         | 141.7                    | 172.0                      | 171.0                     | -2.1                              | -1.5                         | -1.1                           | -1.5                          |
| Minimum        | 128.7                         | 141.7                    | 172.0                      | 171.0                     | -2.5                              | -2.3                         | -2.1                           | -2.3                          |
| Maximum        | 129.7                         | 142.5                    | 172.9                      | 171.8                     | -1.5                              | -1.5                         | -1.1                           | -1.5                          |
| Range          | 1.0                           | 0.8                      | 0.9                        | 0.8                       | 1.0                               | 0.8                          | 0.9                            | 0.8                           |
| Average        | 129.1                         | 142.0                    | 172.5                      | 171.5                     | -2.0                              | -1.8                         | -1.7                           | -2.0                          |
| Std. deviation | 0.4                           | 0.2                      | 0.3                        | 0.3                       | 0.4                               | 0.3                          | 0.3                            | 0.3                           |

**Table S3.2.** Results Processing II with Samsung Galaxy S22 Ultra.

| Model          | Dist.<br>Preauricular<br>(mm) | Dist.<br>Lateral<br>(mm) | Dist.<br>Max right<br>(mm) | Dist.<br>Max left<br>(mm) | Variation<br>Preauricular<br>(mm) | Variation<br>Lateral<br>(mm) | Variation<br>Max right<br>(mm) | Variation<br>Max left<br>(mm) |
|----------------|-------------------------------|--------------------------|----------------------------|---------------------------|-----------------------------------|------------------------------|--------------------------------|-------------------------------|
| 25             | 128.1                         | 141.4                    | 172.3                      | 171.1                     | -0.9                              | -1.1                         | -1.5                           | -1.7                          |
| 26             | 128.5                         | 142.0                    | 172.5                      | 171.6                     | -1.3                              | -1.8                         | -1.7                           | -2.1                          |
| 27             | 129.1                         | 141.9                    | 172.7                      | 171.8                     | -2.0                              | -1.7                         | -1.9                           | -2.3                          |
| 28             | 129.4                         | 142.1                    | 172.4                      | 171.5                     | -2.1                              | -2.0                         | -1.6                           | -2.0                          |
| 29             | 128.1                         | 141.4                    | 172.4                      | 171.8                     | -1.0                              | -1.1                         | -1.6                           | -2.3                          |
| 30             | 129.8                         | 142.3                    | 173.0                      | 171.9                     | -2.6                              | -2.1                         | -2.1                           | -2.4                          |
| 31             | 129.4                         | 142.1                    | 172.5                      | 171.5                     | -2.1                              | -1.9                         | -1.7                           | -2.0                          |
| 32             | 128.8                         | 141.7                    | 172.4                      | 171.5                     | -1.6                              | -1.5                         | -1.6                           | -2.0                          |
| 33             | 128.4                         | 141.8                    | 172.6                      | 171.7                     | -1.1                              | -1.6                         | -1.8                           | -2.1                          |
| 34             | 128.3                         | 141.5                    | 172.1                      | 171.1                     | -1.1                              | -1.3                         | -1.3                           | -1.7                          |
| 35             | 128.9                         | 141.4                    | 172.3                      | 171.1                     | -1.7                              | -1.1                         | -1.5                           | -1.7                          |
| 36             | 128.6                         | 141.1                    | 172.0                      | 171.1                     | -1.4                              | -1.0                         | -1.1                           | -1.7                          |
| Minimum        | 128.7                         | 141.7                    | 172.0                      | 171.0                     | -2.6                              | -2.1                         | -2.1                           | -2.4                          |
| Maximum        | 129.7                         | 142.5                    | 172.9                      | 171.8                     | -0.9                              | -1.0                         | -1.1                           | -1.7                          |
| Range          | 1.0                           | 0.8                      | 0.9                        | 0.8                       | 1.7                               | 1.1                          | 1.0                            | 0.7                           |
| Average        | 129.1                         | 142.0                    | 172.5                      | 171.5                     | -1.6                              | -1.6                         | -1.6                           | -2.0                          |
| Std. deviation | 0.4                           | 0.2                      | 0.3                        | 0.3                       | 0.5                               | 0.4                          | 0.3                            | 0.3                           |

**Table S3.3.** Results Processing III with Samsung Galaxy S22 Ultra.

30

| <b>Model</b>          | <b>Dist.<br/>Preauricular<br/>(mm)</b> | <b>Dist.<br/>Lateral<br/>(mm)</b> | <b>Dist.<br/>Max right<br/>(mm)</b> | <b>Dist.<br/>Max left<br/>(mm)</b> | <b>Variation<br/>Preauricular<br/>(mm)</b> | <b>Variation<br/>Lateral<br/>(mm)</b> | <b>Variation<br/>Max right<br/>(mm)</b> | <b>Variation<br/>Max left<br/>(mm)</b> |
|-----------------------|----------------------------------------|-----------------------------------|-------------------------------------|------------------------------------|--------------------------------------------|---------------------------------------|-----------------------------------------|----------------------------------------|
| 25                    | 127.7                                  | 141.1                             | 172.7                               | 171.5                              | -0.5                                       | -0.9                                  | -1.9                                    | -2.0                                   |
| 26                    | 127.9                                  | 141.5                             | 173.5                               | 172.1                              | -0.7                                       | -1.3                                  | -2.7                                    | -2.7                                   |
| 27                    | 128.7                                  | 141.3                             | 173.1                               | 172.0                              | -1.5                                       | -1.1                                  | -2.3                                    | -2.5                                   |
| 28                    | 129.0                                  | 141.8                             | 173.3                               | 172.4                              | -1.8                                       | -1.6                                  | -2.5                                    | -2.9                                   |
| 29                    | 129.5                                  | 142.1                             | 172.6                               | 171.8                              | -2.3                                       | -2.0                                  | -1.8                                    | -2.3                                   |
| 30                    | 128.7                                  | 142.1                             | 173.1                               | 172.3                              | -1.5                                       | -2.0                                  | -2.3                                    | -2.8                                   |
| 31                    | 130.0                                  | 142.5                             | 172.4                               | 171.5                              | -2.8                                       | -2.3                                  | -1.6                                    | -2.0                                   |
| 32                    | 129.1                                  | 142.0                             | 172.4                               | 171.5                              | -2.0                                       | -1.8                                  | -1.6                                    | -2.0                                   |
| 33                    | 130.3                                  | 142.7                             | 173.4                               | 172.4                              | -3.1                                       | -2.5                                  | -2.6                                    | -2.9                                   |
| 34                    | 128.0                                  | 141.4                             | 172.5                               | 171.5                              | -0.8                                       | -1.1                                  | -1.7                                    | -2.0                                   |
| 35                    | 129.1                                  | 141.7                             | 173.0                               | 172.0                              | -2.0                                       | -1.5                                  | -2.1                                    | -2.5                                   |
| 36                    | 128.6                                  | 141.4                             | 172.5                               | 171.1                              | -1.4                                       | -1.1                                  | -1.7                                    | -1.7                                   |
| <b>Minimum</b>        | 127.7                                  | 141.1                             | 172.4                               | 171.1                              | -3.1                                       | -2.5                                  | -2.7                                    | -2.9                                   |
| <b>Maximum</b>        | 130.3                                  | 142.7                             | 173.5                               | 172.4                              | -0.5                                       | -0.9                                  | -1.6                                    | -1.7                                   |
| <b>Range</b>          | 2.6                                    | 1.6                               | 1.1                                 | 1.3                                | 2.6                                        | 1.6                                   | 1.1                                     | 1.1                                    |
| <b>Average</b>        | <b>128.9</b>                           | <b>141.8</b>                      | <b>172.9</b>                        | <b>171.8</b>                       | <b>-1.7</b>                                | <b>-1.6</b>                           | <b>-2.0</b>                             | <b>-2.4</b>                            |
| <b>Std. deviation</b> | 0.8                                    | 0.5                               | 0.4                                 | 0.4                                | 0.8                                        | 0.5                                   | 0.4                                     | 0.4                                    |

31
